# Supplementary material for: Investigating the effect of AS03 adjuvant on the plasma cell repertoire following pH1N1 influenza vaccination
Source: PubMed Central journal article supplement (PMC5110968; doi:10.1038/srep37229), 2016-11-16
Supplement: srep37229-s1.pdf [file srep37229-s1.pdf]

## **Supplementary Information**

Investigating the effect of AS03 adjuvant on the plasma cell repertoire following pH1N1  
influenza vaccination

J. D. Galson, J. Trück, D. F. Kelly, & R. van der Most

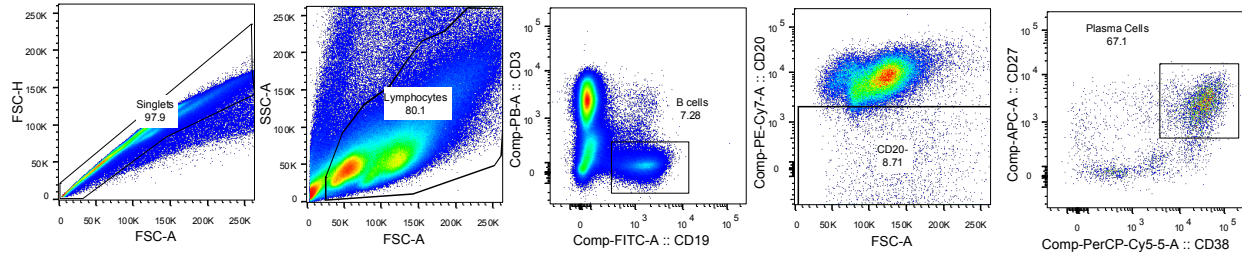

**Fig. S1.** Cell sorting gating strategy. Doublets were gated out, and lymphocytes gated based on forward scatter and side scatter. B cells were identified as the CD3-, CD19+ lymphocyte population, and plasma cells were then identified as the CD20-, CD27+ and CD38+ B cell population.

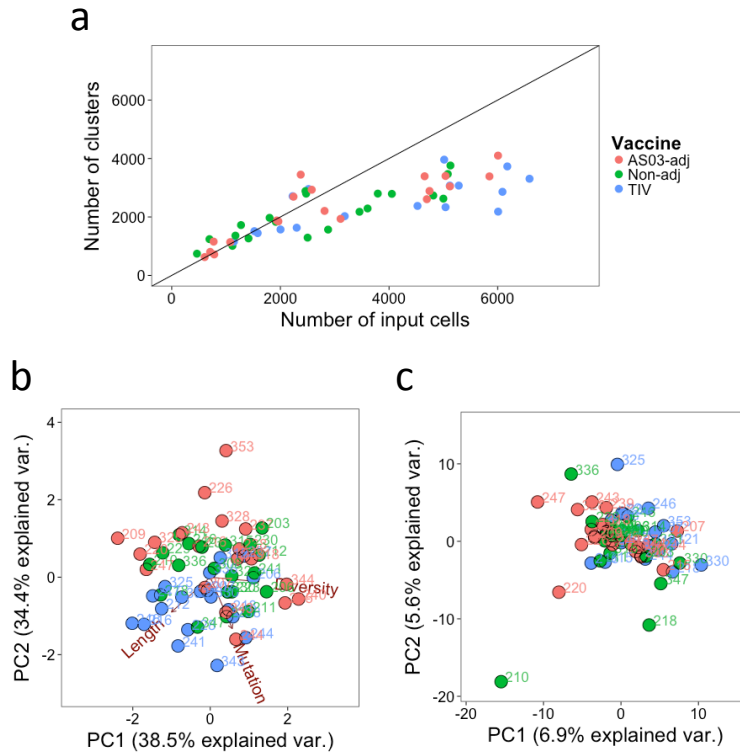

**Fig. S2.** BCR repertoire quality control measures for plasma samples after each vaccine. **(a)** Relationship between the number of plasma cells isolated from each sample, and the number of clusters generated from the sequence data of that sample. Line represents  $x=y$ . **(b)** Principle component analysis based on general repertoire properties of Shannon diversity, mutation, and CDR3 sequence length. **(c)** Principle component analysis based on the proportion of the repertoire comprised by clusters utilizing different V gene segments.

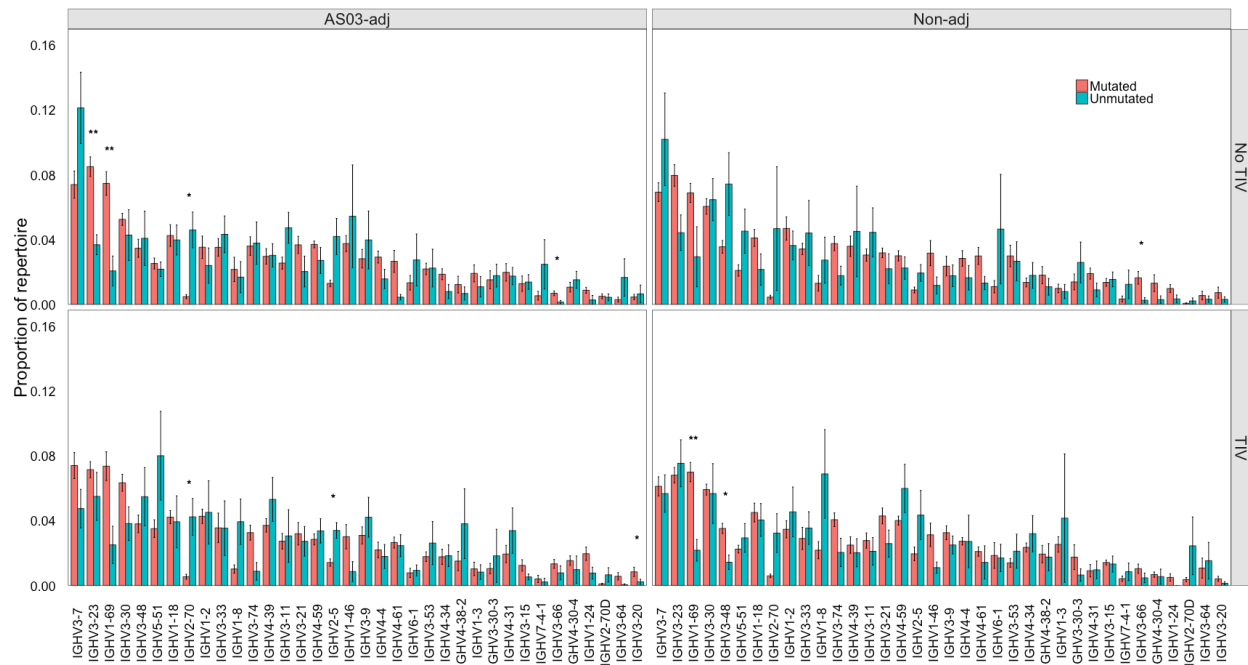

**Fig. S3.** Comparing V gene usage of unmutated naïve clusters to mutated clusters derived from memory recall split by vaccine group. For each sample, the proportion of both mutated and unmutated clusters utilizing different V gene segments was determined, and this was split by whether adjuvanted or non-adjuvanted vaccine was given, and whether there was prior TIV vaccination. Bars show mean values  $\pm$  SEM. Shown are the V genes with a proportion above 0.005 in at least one of the groups. Comparisons were performed using a two-sided paired t-test. \*  $p < 0.01$ , \*\*  $p < 0.001$ , \*\*\*  $p < 0.0001$

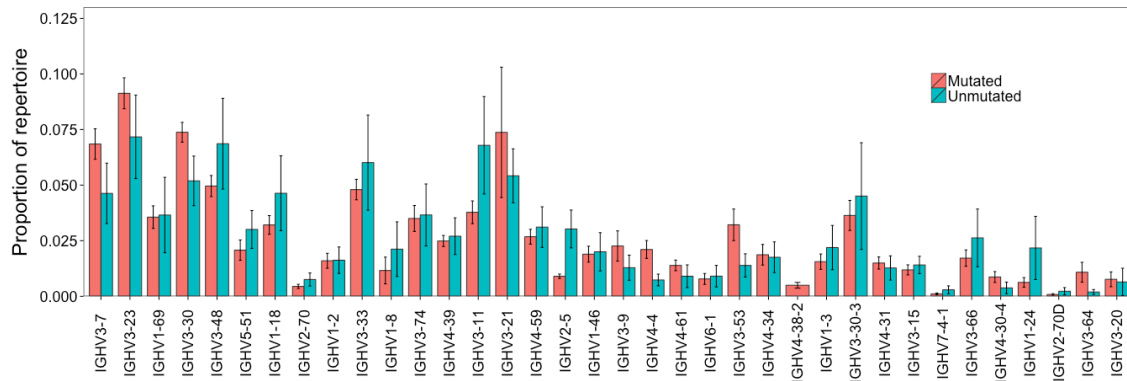

**Fig. S4.** Comparing unmutated and mutated clusters derived from plasma cells in the absence of a specific immune stimulus. For each sample, the proportion of both mutated and unmutated clusters utilizing different V gene segments was determined. V gene ordering on the y axis is the same as shown in Fig. 4. N=14.

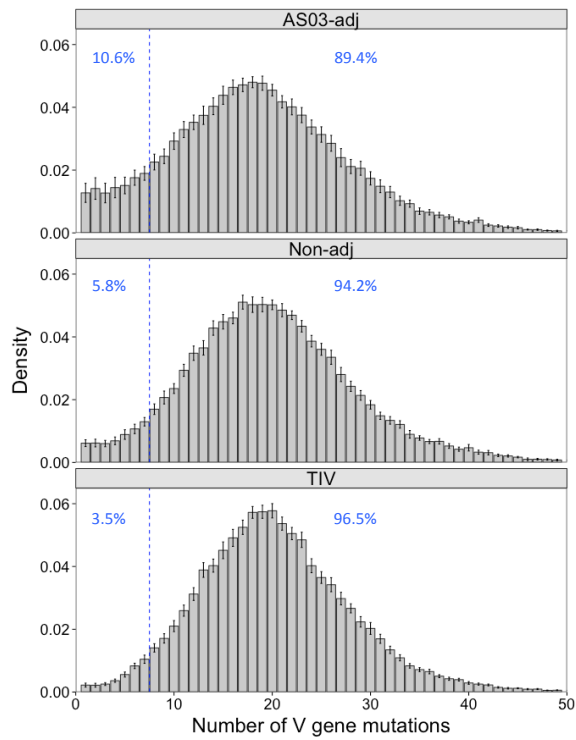

**Fig. S5.** Distribution of clusters with different mean numbers of V gene mutations, split by vaccine group. Dotted vertical line separates clusters defined as unmutated or mutated (threshold of 7). Bars show mean values  $\pm$  SEM.

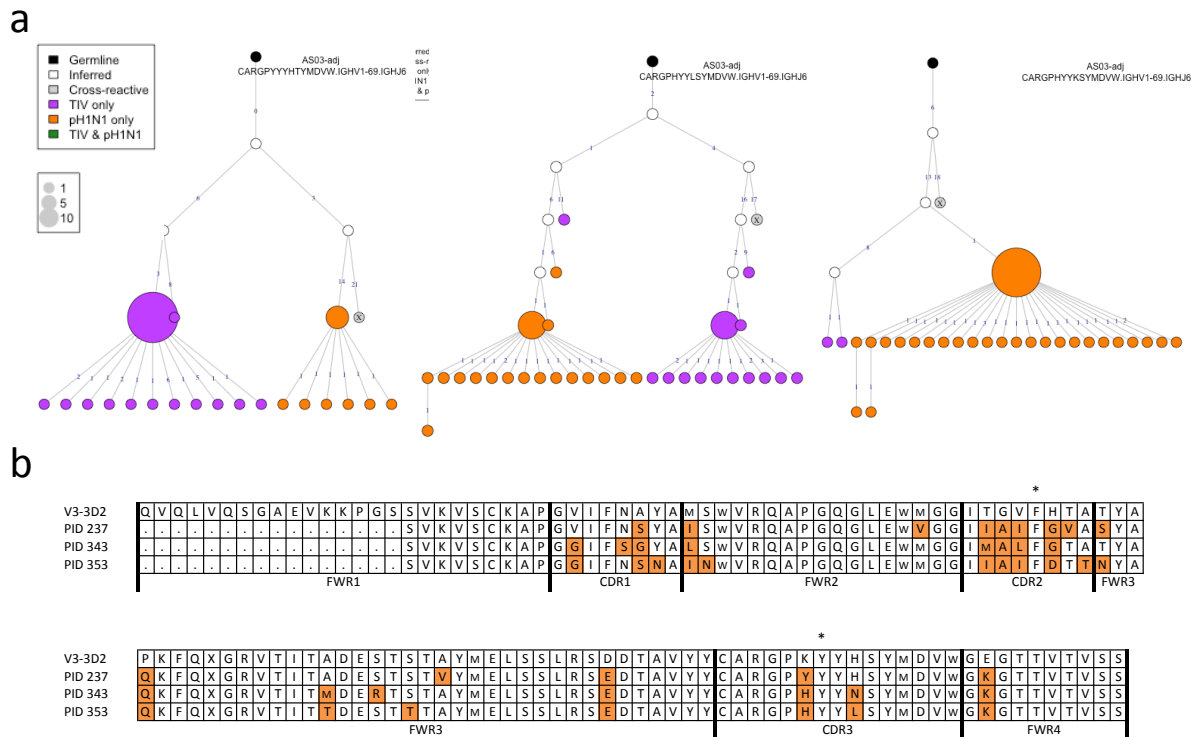

**Fig. S6.** Similarity of the previously described cross-reactive sequence (V3-3DT) to sequences in our dataset. **(a)** Lineages generated from the combined TIV and pH1N1 data with similarity to V3-3DT. The V3-3DT sequence is included in the lineage generation. Each node in the lineage tree represents a unique sequence, and the size of the node represents the number of those sequences. The black node is the germline sequence, white nodes are inferred common ancestor sequences, the colored nodes are those found in the datasets (purple = TIV only, orange = pH1N1), and the grey node with the “X” is the V3-3DT sequence. Numbers on the edges of adjoining nodes show the number of mutations separating the sequences. **(b)** Alignment of the V3-3DT AA sequence to the closest match from the three lineages. Orange squares represent differences. \* Residues with particular importance for antigen binding.

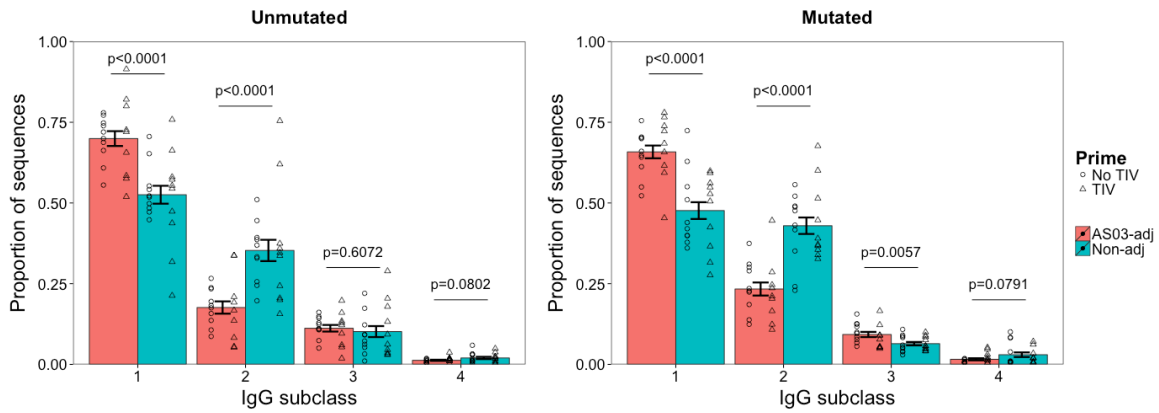

**Fig. S7.** Analysis of IgG subclass usage split by mutated and unmutated sequences. For each participant, the clusters were split according to mutation level (less than 8 mutations = unmutated, and more than 8 = mutated), and the proportion of sequences of each IgG subclass was determined. Bars show mean values  $\pm$  SEM. P values represent the result from a two-sided t-test. Individual data points are shown, with the shape representative of whether the participant received the seasonal TIV prior to pH1N1 vaccination.



**Table S1.** Number of cells, raw sequence reads, filtered sequence reads, and clusters obtained for each plasma cell sample.

| <b>Participant</b> | <b>Vaccine</b> | <b>Cell number</b> | <b>Raw Sequences</b> | <b>Filtered sequences</b> | <b>Clusters</b> |
|--------------------|----------------|--------------------|----------------------|---------------------------|-----------------|
| 207                | AS03-adj       | 1963               | 311089               | 144242                    | 1849            |
| 237                | AS03-adj       | 4745               | 381734               | 193031                    | 2888            |
| 238                | AS03-adj       | 2241               | 329443               | 164355                    | 2693            |
| 244                | AS03-adj       | 1933               | 315791               | 155593                    | 1879            |
| 247                | AS03-adj       | 606                | 343785               | 178377                    | 627             |
| 343                | AS03-adj       | 3108               | 310611               | 150935                    | 1935            |
| 353                | AS03-adj       | 5121               | 300489               | 161379                    | 3046            |
| 216                | AS03-adj       | 2813               | 286853               | 139327                    | 2207            |
| 325                | AS03-adj       | 707                | 355057               | 189135                    | 804             |
| 209                | AS03-adj       | 782                | 318189               | 160831                    | 718             |
| 215                | AS03-adj       | 6006               | 383915               | 190962                    | 4099            |
| 220                | AS03-adj       | 771                | 326679               | 161972                    | 1156            |
| 226                | AS03-adj       | 5848               | 336676               | 170909                    | 3388            |
| 239                | AS03-adj       | 4696               | 227580               | 112361                    | 2608            |
| 240                | AS03-adj       | 4655               | 325885               | 153925                    | 3392            |
| 328                | AS03-adj       | 2577               | 290798               | 136686                    | 2931            |
| 344                | AS03-adj       | 5040               | 287659               | 149208                    | 3402            |
| 243                | AS03-adj       | 1076               | 374145               | 150293                    | 1138            |
| 318                | AS03-adj       | 2374               | 365403               | 184945                    | 3448            |
| 206                | Non-adj        | 4815               | 358695               | 173032                    | 2733            |
| 212                | Non-adj        | 3605               | 347768               | 167570                    | 2290            |
| 218                | Non-adj        | 2501               | 338607               | 151708                    | 1292            |
| 228                | Non-adj        | 1275               | 302111               | 138733                    | 1722            |
| 241                | Non-adj        | 3793               | 320134               | 162093                    | 2799            |
| 246                | Non-adj        | 4052               | 340498               | 168373                    | 2790            |
| 315                | Non-adj        | 1916               | 339940               | 176107                    | 1832            |
| 321                | Non-adj        | 3456               | 330906               | 162663                    | 2177            |
| 330                | Non-adj        | 5000               | 301945               | 144793                    | 2627            |
| 336                | Non-adj        | 1117               | 253429               | 142586                    | 1012            |
| 203                | Non-adj        | 2474               | 268607               | 126200                    | 2797            |
| 210                | Non-adj        | 464                | 371013               | 193104                    | 743             |
| 211                | Non-adj        | 694                | 266428               | 129160                    | 1241            |
| 223                | Non-adj        | 1172               | 342051               | 156535                    | 1361            |
| 229                | Non-adj        | 1413               | 335175               | 160619                    | 1266            |
| 230                | Non-adj        | 2461               | 264889               | 136836                    | 2885            |
| 231                | Non-adj        | 1801               | 320018               | 162852                    | 1970            |
| 308                | Non-adj        | 5130               | 369861               | 178008                    | 3760            |

|     |         |       |        |        |      |
|-----|---------|-------|--------|--------|------|
| 314 | Non-adj | 2878  | 382207 | 204088 | 1567 |
| 347 | Non-adj | 5082  | 378231 | 185098 | 3469 |
| 206 | TIV     | 6177  | 386565 | 190146 | 3729 |
| 212 | TIV     | 3184  | 282988 | 143753 | 2027 |
| 218 | TIV     | 4524  | 331594 | 174269 | 2377 |
| 228 | TIV     | 1521  | 265217 | 135653 | 1513 |
| 241 | TIV     | 5040  | 334283 | 169037 | 2334 |
| 246 | TIV     | 6008  | 284785 | 148185 | 2182 |
| 315 | TIV     | 2002  | 320567 | 144717 | 1571 |
| 321 | TIV     | 5119  | 358420 | 174237 | 3072 |
| 330 | TIV     | 2518  | 346997 | 184586 | 2956 |
| 336 | TIV     | 10651 | 377916 | 185996 | 3522 |
| 207 | TIV     | 6088  | 341042 | 184384 | 2860 |
| 237 | TIV     | 5015  | 395822 | 197720 | 3960 |
| 238 | TIV     | 6586  | 402635 | 196310 | 3307 |
| 244 | TIV     | 2225  | 290349 | 135800 | 2710 |
| 247 | TIV     | 2300  | 359212 | 178606 | 1632 |
| 343 | TIV     | 10003 | 382209 | 196999 | 4528 |
| 353 | TIV     | 5283  | 399934 | 212514 | 3073 |
| 216 | TIV     | 1582  | 273374 | 142088 | 1447 |
| 325 | TIV     | 1144  | 263354 | 141696 | 1155 |

**Table S2.** Differences in V gene usage of the recalled sequences between the adjuvanted and non-adjuvanted vaccine groups. P value represents the result from a two-sided t test.

| <b>V gene</b> | <b>P value</b> |
|---------------|----------------|
| IGHV1-18      | 0.032640406    |
| IGHV3-20      | 0.043151999    |
| IGHV1-69      | 0.058279113    |
| IGHV3-30-3    | 0.08134377     |
| IGHV4-30-4    | 0.128422804    |
| IGHV5-51      | 0.130176845    |
| IGHV3-7       | 0.175057635    |
| IGHV3-73      | 0.180154569    |
| IGHV3-15      | 0.189379996    |
| IGHV3-43      | 0.190123149    |
| IGHV4-28      | 0.190123149    |
| IGHV3-30      | 0.208455681    |
| IGHV3-23      | 0.238371259    |
| IGHV3-49      | 0.268385833    |
| IGHV1-46      | 0.275295246    |
| IGHV3-48      | 0.283181036    |
| IGHV3-72      | 0.286007224    |
| IGHV3-74      | 0.319574       |
| IGHV3-13      | 0.343436396    |
| IGHV3-43D     | 0.343436396    |
| IGHV3-64      | 0.343436396    |
| IGHV5-10-1    | 0.343436396    |
| IGHV1-69-2    | 0.346593507    |
| IGHV2-70      | 0.346593507    |
| IGHV3-64D     | 0.346593507    |
| IGHV1-24      | 0.354672875    |
| IGHV7-4-1     | 0.376604538    |
| IGHV2-5       | 0.383093744    |
| IGHV4-39      | 0.392086809    |
| IGHV1-3       | 0.436852103    |
| IGHV3-66      | 0.452579118    |
| IGHV3-11      | 0.481378339    |
| IGHV6-1       | 0.559274072    |
| IGHV3-21      | 0.600622076    |
| IGHV1-58      | 0.620474415    |
| IGHV3-53      | 0.622104274    |
| IGHV4-4       | 0.668144457    |
| IGHV3-NL1     | 0.696850906    |

|            |             |
|------------|-------------|
| IGHV4-59   | 0.700206038 |
| IGHV4-38-2 | 0.74353451  |
| IGHV4-34   | 0.799007524 |
| IGHV4-61   | 0.848269843 |
| IGHV4-30-2 | 0.858577832 |
| IGHV3-33   | 0.877714457 |
| IGHV3-9    | 0.917894644 |
| IGHV1-2    | 0.958548807 |
| IGHV1-8    | 0.966585141 |
| IGHV4-31   | 0.995102861 |
